# Supplementary material for: MicroRNA Expression Profiles in Autism Spectrum Disorder: Role for miR-181 in Immunomodulation
Source: MDPI journal article supplement (doi:10.3390/jpm11090922), 2021-09-17
Supplement: s1 [file s1]

Supplementary Table S1: miRNA and gene expression assays for qRT-PCR

A) Primer miScript Assays (Qiagen, Valencia, CA)

| <b>SYBR Green Assays</b> | <b>Catalog number</b> | <b>Entrez Gene ID</b> |
|--------------------------|-----------------------|-----------------------|
| Hsa-miR-320a             | MS00014707            | 407037                |
| Hsa-miR-181a-5p          | MS00008827            | 406954                |
| Hsa-miR-181b-5p          | MS00006699            | 406955                |
| Hsa-miR-181c-5p          | MS00008841            | 406957                |
| Hsa-miR-181d-5p          | MS00031500            | 574457                |
| Ce_miR39_1               | MS00019789            | N/A                   |
| Hs_RNU6                  | MS00033740            | N/A                   |

B) TaqMan gene expression assays (ThermoFisher Scientific, Carlsbad, CA)

| <b>Taqman Assays</b> | <b>Assay ID</b> | <b>Entrez Gene ID</b> |
|----------------------|-----------------|-----------------------|
| AKT3                 | Hs00987343_m1   | 10000                 |
| TNF                  | Hs00174128_m1   | 7124                  |
| AKT2                 | Hs01086099_m1   | 208                   |
| SCN2A                | Hs01109871_m1   | 6326                  |
| ATM                  | Hs00175892_m1   | 472                   |
| GZMB                 | Hs00188051_m1   | 3002                  |
| CAMK2A               | Hs00947041_m1   | 815                   |
| PIK3CG               | Hs00932391_m1   | 5294                  |
| EIF4E2               | Hs00601369_g1   | 9470                  |
| IL2                  | Hs00174114_m1   | 3558                  |
| CAMK2B               | Hs00365799_m1   | 816                   |
| GAPDH                | Hs02758991_g1   | 2597                  |
