# Supplementary material for: MicroRNA Expression Profiles in Autism Spectrum Disorder: Role for miR-181 in Immunomodulation
Source: MDPI journal article supplement (doi:10.3390/jpm11090922), 2021-09-17
Supplement: s1 [file s1]

**A)**

Pie chart for Rfam C\_11626 (Total)

rRNA (44379 [31.54%])  
 others (39036 [27.74%])  
 snoRNA (29166 [20.73%])  
 tRNA (26492 [18.83%])  
 snRNA (1645 [1.17%])

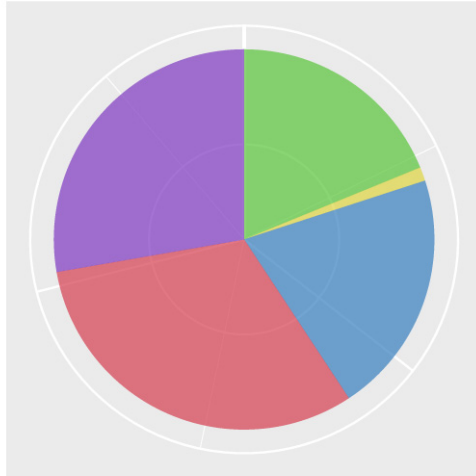

Pie chart for Rfam C\_11626 (Unique)

rRNA (912 [29.91%])  
 snoRNA (785 [25.75%])  
 tRNA (781 [25.61%])  
 others (453 [14.86%])  
 snRNA (118 [3.87%])

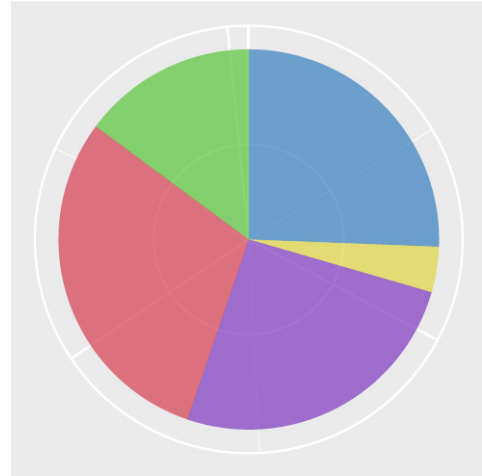

Pie chart for Rfam A\_A\_2591 (Total)

rRNA (50361 [28.59%])  
 tRNA (50213 [28.51%])  
 snoRNA (38782 [22.02%])  
 others (35207 [19.99%])  
 snRNA (1561 [0.89%])

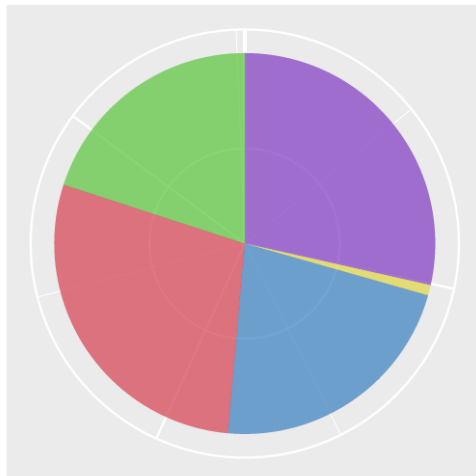

Pie chart for Rfam A\_A\_2591 (Unique)

rRNA (1315 [34.89%])  
 snoRNA (933 [24.75%])  
 tRNA (790 [20.96%])  
 others (612 [16.24%])  
 snRNA (119 [3.16%])

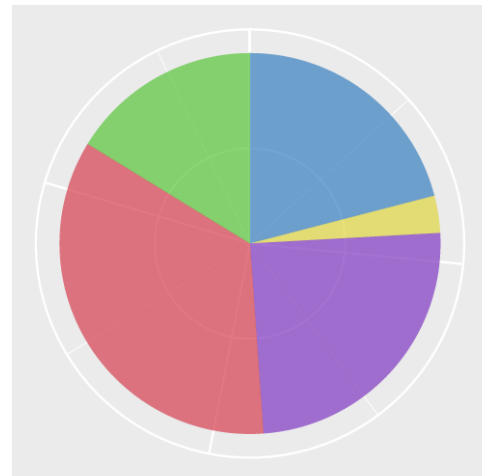

**B)**

Supplementary Figure S1: Pie chart distribution annotation of small RNAs total vs unique shown as an example in ASD (2591) and control (11626) sample.
