# Supplementary figures and images for: MicroRNA Expression Profiles in Autism Spectrum Disorder: Role for miR-181 in Immunomodulation
Source: MDPI journal article supplement (doi:10.3390/jpm11090922), 2021-09-17

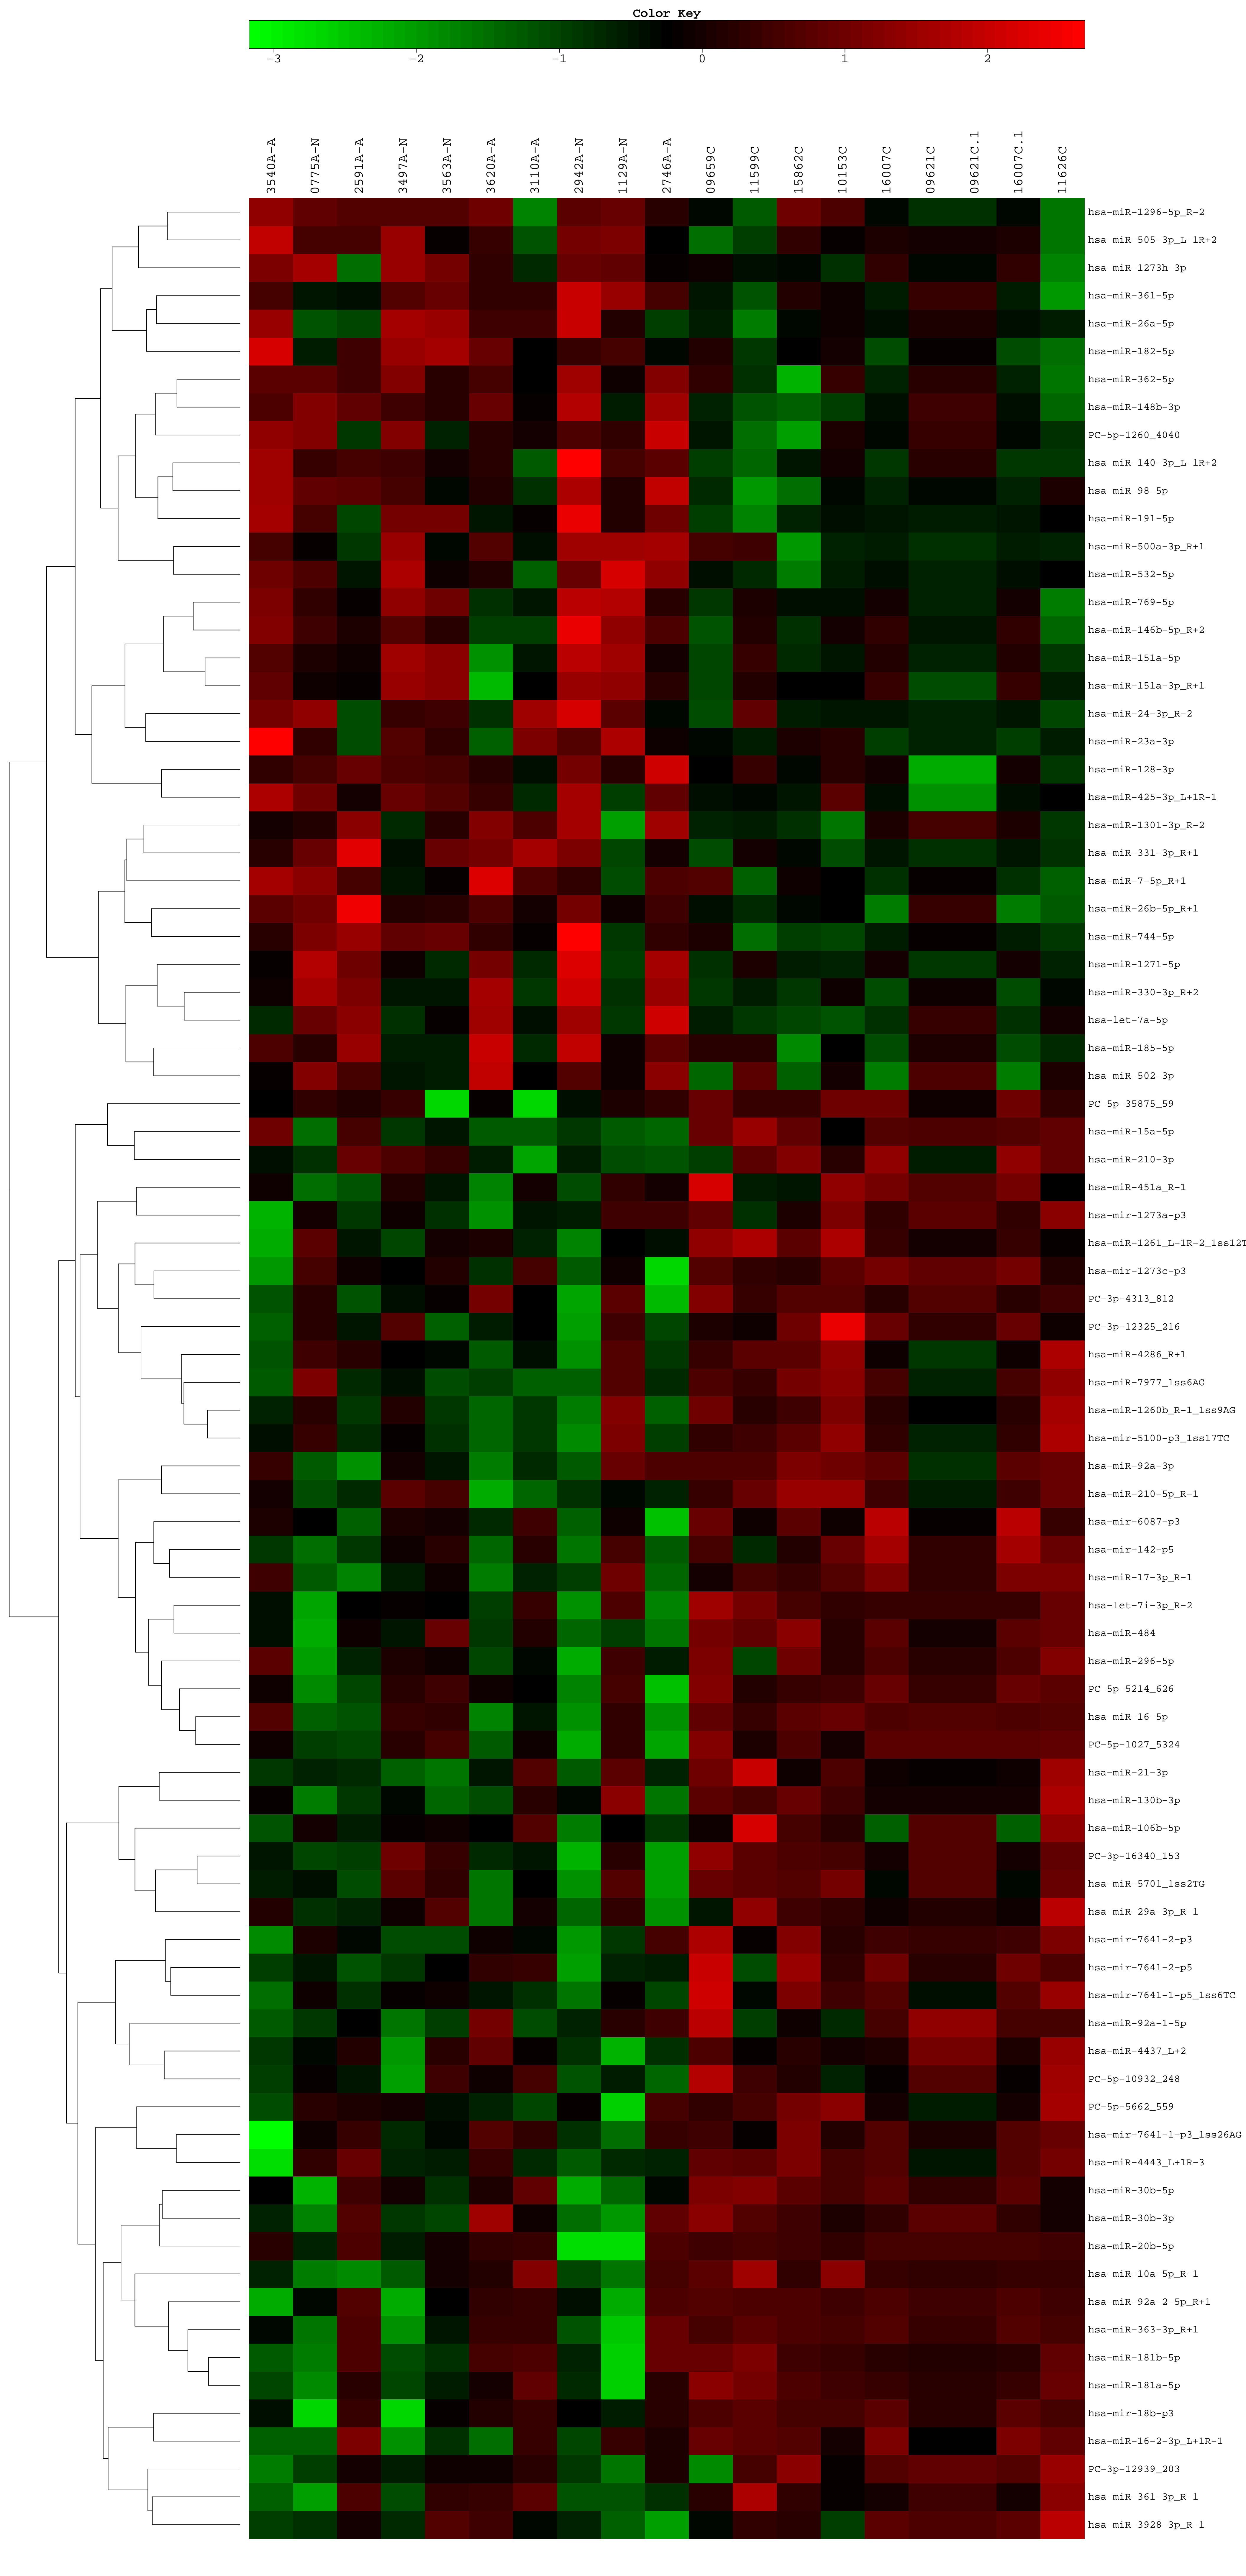

Supplement: s1 [file s1]

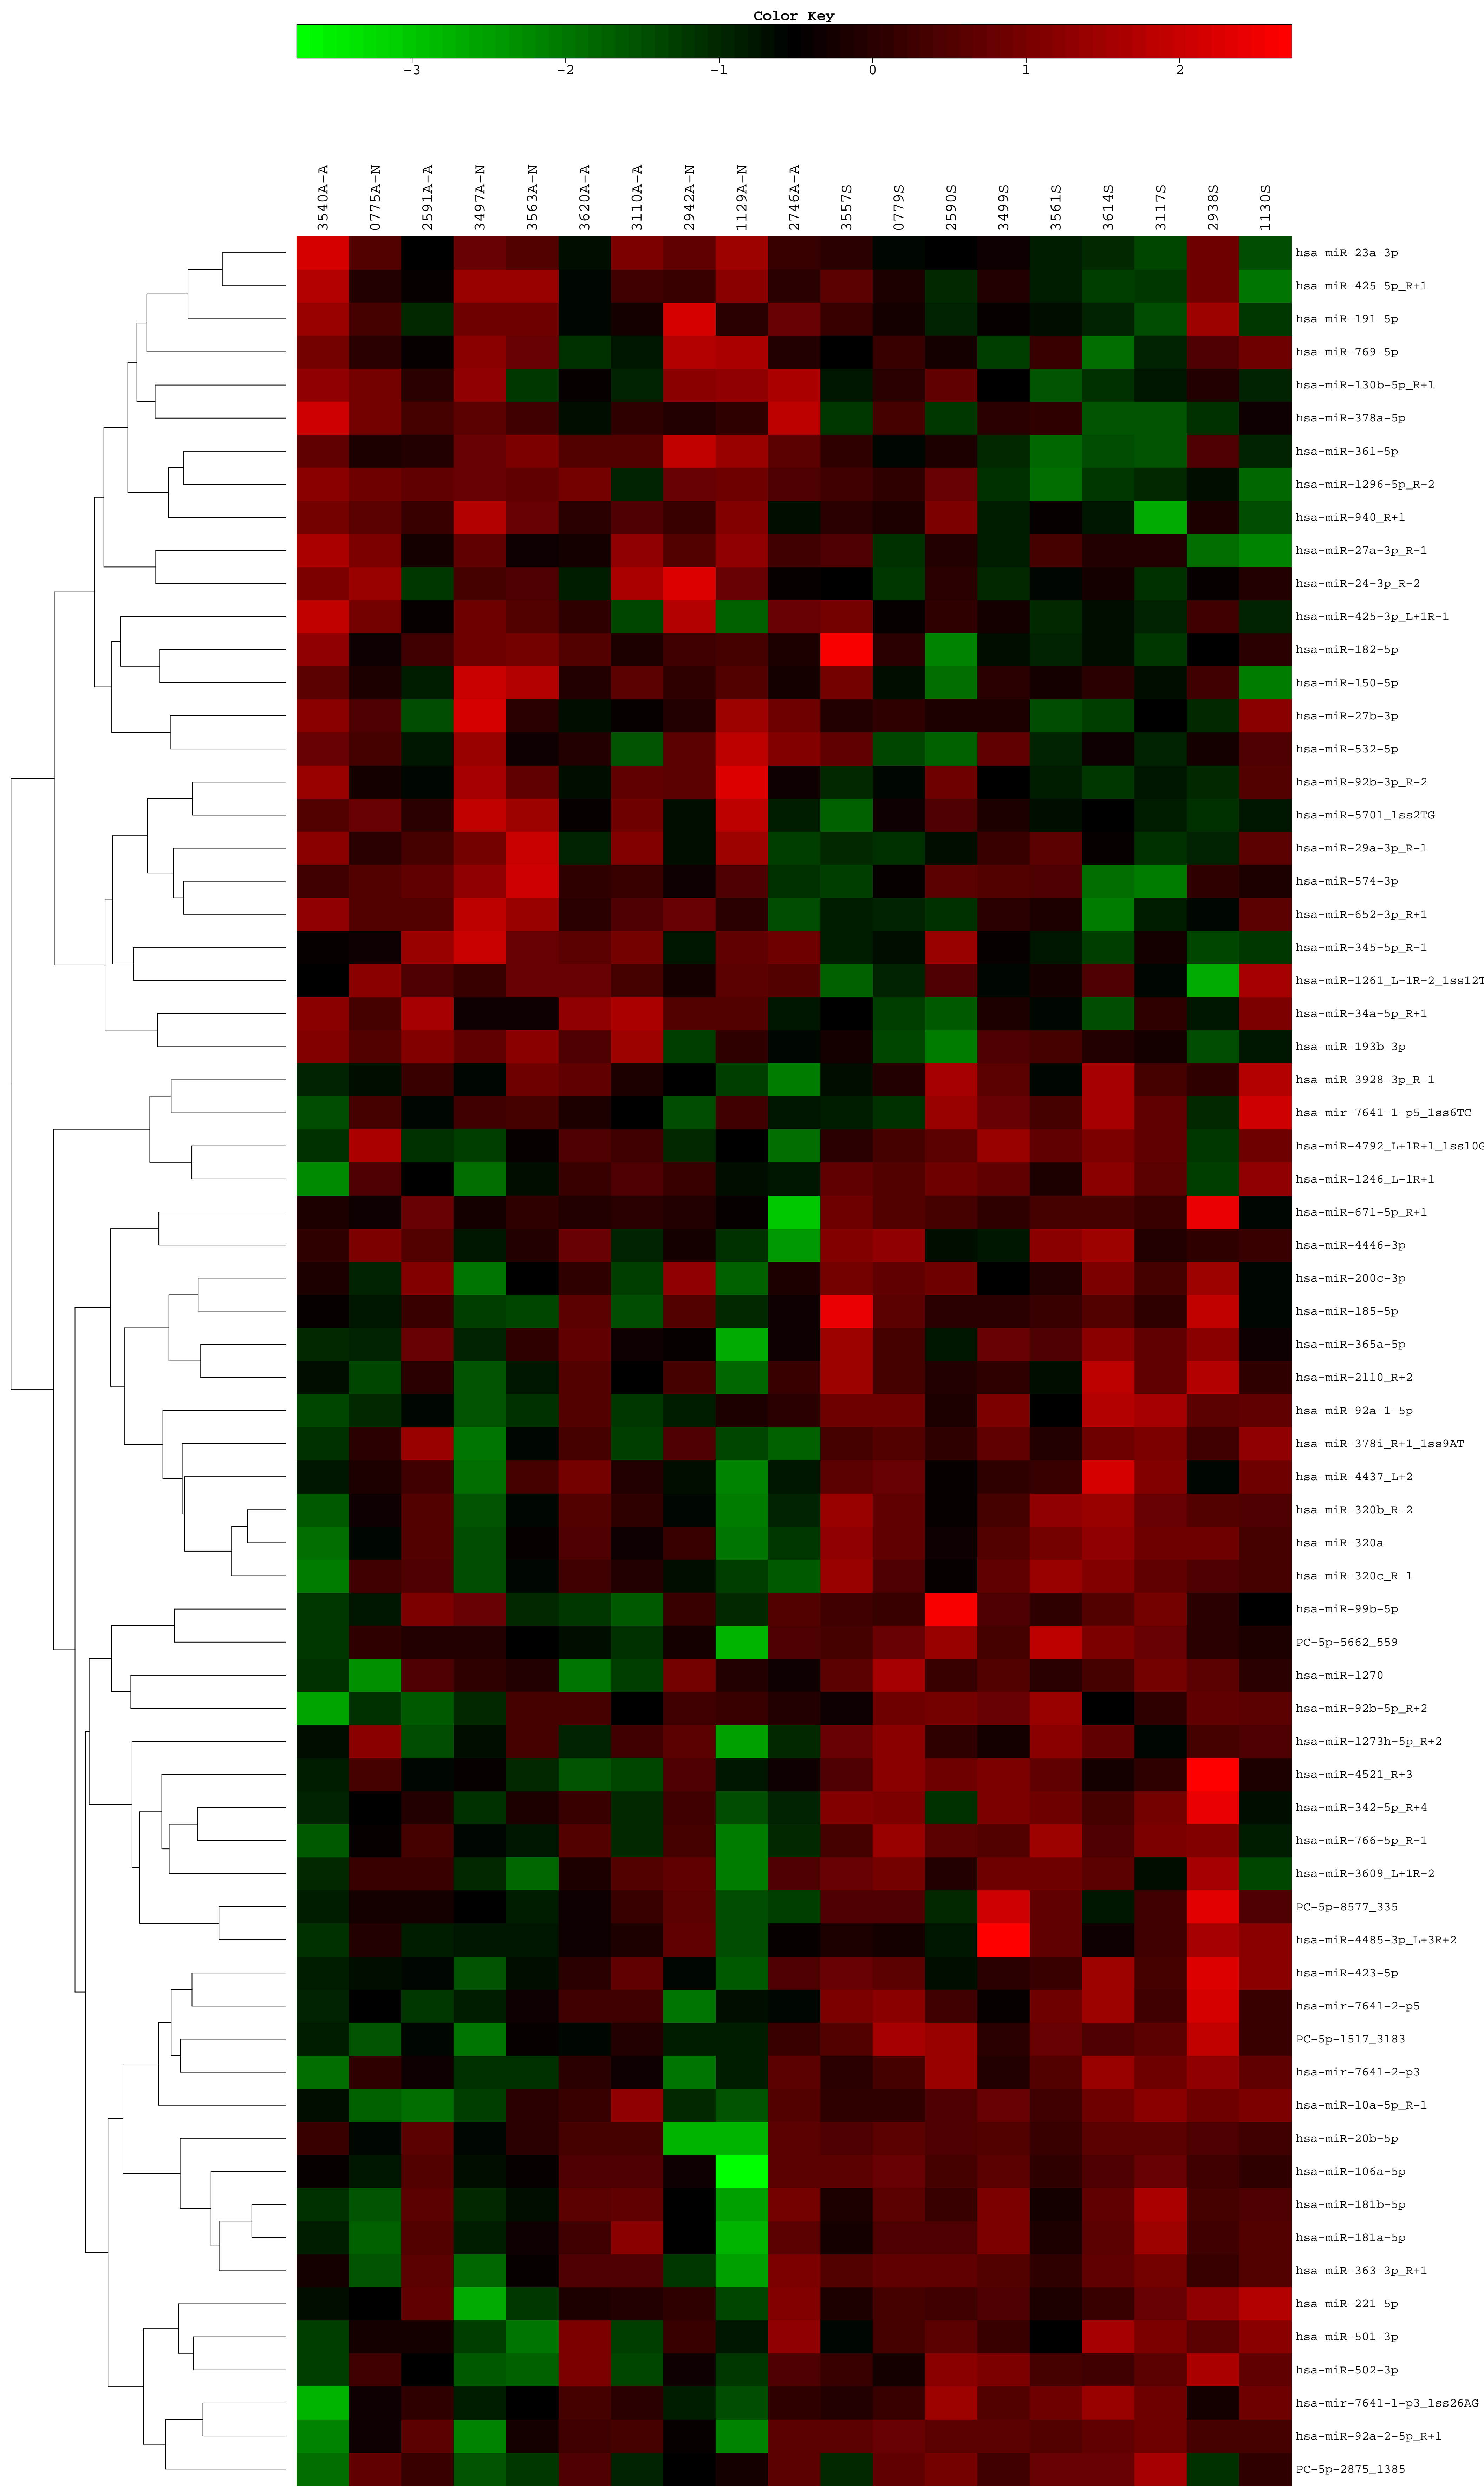

Supplement: s1 [file s1]
